# Supplementary material for: A multi-model intercomparison of halogenated very short-lived substances (TransCom-VSLS):linking oceanic emissions and tropospheric transport for a reconciled estimate ofthe stratospheric source gas injection of bromine
Source: Copernicus journal article supplement (doi:10.5194/acp-16-9163-2016), 2016-07-26
Supplement: Supplementary file 1 [file acp-16-9163-2016-supplement.zip]

Archive with 4 entries (4 files):
- ACTM_CHBr3_Ziska.mov
- SI.pdf
- acp-16-9163-2016-supplement-title-page.pdf
- ACTM_CHBr3_Liang.mov
