# Supplementary material for: A multi-model intercomparison of halogenated very short-lived substances (TransCom-VSLS):linking oceanic emissions and tropospheric transport for a reconciled estimate ofthe stratospheric source gas injection of bromine
Source: Copernicus journal article supplement (doi:10.5194/acp-16-9163-2016), 2016-07-26
Supplement: Supplementary file 1 [file acp-16-9163-2016-supplement.zip › acp-16-9163-2016-supplement-title-page.pdf]

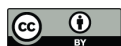

## *Supplement of*

# **A multi-model intercomparison of halogenated very short-lived substances (TransCom-VSLS): linking oceanic emissions and tropospheric transport for a reconciled estimate of the stratospheric source gas injection of bromine**

**R. Hossaini et al.**

*Correspondence to:* Ryan Hossaini ([r.hossaini@lancaster.ac.uk](mailto:r.hossaini@lancaster.ac.uk))

- [acp-16-9163-2016-supplement-title-page.pdf](#)
- [ACTM\\_CHBr3\\_Liang.mov](#)
- [ACTM\\_CHBr3\\_Ziska.mov](#)
- [SI.pdf](#)

The copyright of individual parts of the supplement might differ from the CC-BY 3.0 licence.
